# Supplementary material for: Prognostic Value of Right Ventricular Afterload in Patients Undergoing Mitral Transcatheter Edge‐to‐Edge Repair
Source: PubMed Central journal article supplement — J Am Heart Assoc. 2024 Apr 3;13(8):e033510. doi: 10.1161/JAHA.123.033510 (PMC11262498; doi:10.1161/jaha.123.033510), 2024-04-03
Supplement: JAH3-13-e033510-s001.pdf [file JAH3-13-e033510-s001.pdf]

# **SUPPLEMENTAL MATERIAL**

**Table S1. Baseline clinical, echocardiographic, procedural, and clinical outcomes of patients who had RHC vs. patients who did not have RHC.**

| <b>Baseline Characteristics</b>          | <b>Overall<br/>N=298</b> | <b>No RHC<br/>N=184</b> | <b>RHC<br/>N=114</b> | <b>p-value</b> |
|------------------------------------------|--------------------------|-------------------------|----------------------|----------------|
| Age (years)                              | 76.2 [10.5]              | 78.0 [10.5]             | 74.7 [10.6]          | <b>0.01</b>    |
| Female                                   | 127 (42.6)               | 87 (47.3)               | 40 (35.1)            | <b>0.03</b>    |
| Diabetes                                 | 82 (27.5)                | 47 (25.5)               | 35 (30.7)            | 0.33           |
| Prior Myocardial Infarction              | 55 (18.5)                | 29 (15.8)               | 26 (22.8)            | 0.13           |
| Dialysis                                 | 19 (6.4)                 | 12 (6.5)                | 7 (6.1)              | 0.89           |
| Atrial Fibrillation                      | 178 (60.1)               | 103 (56.3)              | 75 (66.4)            | 0.08           |
| Coronary Artery Disease                  | 110 (36.9)               | 67 (36.4)               | 43 (37.7)            | 0.82           |
| Frail                                    | 206 (69.1)               | 125 (67.9)              | 81 (71.1)            | 0.57           |
| BMI (kg/m <sup>2</sup> )                 | 26.1 [6.0]               | 26.0 [6.5]              | 26.3 [5.2]           | 0.70           |
| Hypertension                             | 213 (71.5)               | 129 (70.1)              | 84 (73.7)            | 0.50           |
| Prior PPM                                | 47 (15.8)                | 30 (16.3)               | 17 (14.9)            | 0.74           |
| Prior CABG                               | 71 (23.8)                | 44 (23.9)               | 27 (23.7)            | 0.96           |
| Prior PCI                                | 66 (22.1)                | 41 (22.3)               | 25 (21.9)            | 0.94           |
| STS Risk MV repair (%)                   | 3.7 (2.1-6.4)            | 4.2 (2.2-6.9)           | 3.0 (1.5-5.3)        | 0.08           |
| NYHA III/IV                              | 230 (79.0)               | 135 (75.0)              | 95 (85.8)            | <b>0.03</b>    |
| Creatinine (mg/dL)                       | 1.6 [1.4]                | 1.6 [1.5]               | 1.6 [1.3]            | 0.86           |
| <b>Echocardiographic Characteristics</b> |                          |                         |                      |                |
| MR severity                              |                          |                         |                      |                |
| 3+                                       | 59 (19.8)                | 33 (18.0)               | 26 (22.8)            | 0.67           |
| 4+                                       | 239 (80.2)               | 151 (82.0)              | 88 (77.2)            |                |
| MR etiology                              |                          |                         |                      |                |
| Primary                                  | 160 (53.7)               | 102 (55.4)              | 58 (50.9)            | 0.33           |
| Secondary                                | 110 (36.9)               | 61 (33.2)               | 49 (43.0)            |                |
| Mixed                                    | 28 (9.4)                 | 21 (11.4)               | 7 (6.1)              |                |
| PASP (mmHg)                              | 52.8 [17.5]              | 53.1 [16.2]             | 52.2 [19.4]          | 0.69           |
| LV Ejection Fraction (%)                 | 51.2 [14.6]              | 52.4 [15.1]             | 49.6 [14.0]          | 0.11           |
| TR Severity $\geq$ moderate              | 110 (36.9)               | 70 (38.0)               | 40 (35.1)            | 0.60           |
| <b>Procedural Characteristics</b>        |                          |                         |                      |                |
| Number of clips                          | 1.5 [0.5]                | 1.4 [0.5]               | 1.6 [0.6]            | <b>0.02</b>    |
| Baseline Mean LAP (mmHg)                 | 20.0 [8.1]               | 20.0 [7.9]              | 20.0 [8.4]           | 0.99           |
| Baseline V-wave (mmHg)                   | 34.7 [17.0]              | 35.0 [16.2]             | 34.5 [18.2]          | 0.81           |
| Post-procedural Mean LAP (mmHg)          | 15.0 [5.8]               | 15.1 [5.7]              | 15.0 [6.1]           | 0.89           |
| Post-procedural V-wave (mmHg)            | 21.7 [9.4]               | 22.0 [9.2]              | 21.5 [9.7]           | 0.63           |
| <b>Outcomes:</b>                         |                          |                         |                      |                |
| <b>In-hospital</b>                       |                          |                         |                      |                |
| Length of Stay (days)                    | 2 (1-4)                  | 2 (1-3)                 | 2 (1-5)              | 0.15           |
| Discharge MR $\geq$ moderate             | 62 (20.8)                | 35 (19.0)               | 27 (23.6)            | 0.33           |

|                       |             |             |             |      |
|-----------------------|-------------|-------------|-------------|------|
| Discharge TMPG (mmHg) | 4.2 [1.9]   | 4.3 [2.0]   | 4.0 [1.8]   | 0.29 |
| <b>30-day</b>         |             |             |             |      |
| NYHA (III/IV)         | 33 (15.5)   | 22 (16.1)   | 11 (14.5)   | 0.75 |
| MR $\geq$ moderate    | 79 (29.9)   | 44 (26.6)   | 35 (36.0)   | 0.20 |
| TR $\geq$ moderate    | 72 (27.8)   | 40 (25.0)   | 32 (32.3)   | 0.20 |
| PASP (mmHg)           | 47.2 [14.4] | 46.2 [14.9] | 48.7 [13.8] | 0.23 |
| TMPG (mmHg)           | 4.4 [2.2]   | 4.5 [2.3]   | 4.3 [2.1]   | 0.33 |
| <b>2-year</b>         |             |             |             |      |
| Mortality             | 85 (28.5)   | 52 (28.3)   | 33 (28.9)   | 0.89 |
| HFH                   | 49 (16.4)   | 30 (16.3)   | 18 (15.8)   | 0.93 |
| Composite             | 117 (39.3)  | 72 (39.1)   | 44 (38.6)   | 0.95 |
| <b>Overall</b>        |             |             |             |      |
| Follow-up (months)    | 27 [21]     | 26 [21]     | 28 [21]     | 0.22 |

Values are expressed as Mean [Standard Deviation], median (IQR: 1<sup>st</sup>-3<sup>rd</sup> quartile), or N (%)

BMI= body mass index; CABG= coronary artery bypass graft; FU: follow up; HFH: heart failure hospitalization; LAP: left atrial pressure; LVEF= left ventricle ejection fraction; MR= mitral regurgitation; NYHA= New York Heart Association; PCI= percutaneous coronary intervention; RHC= right heart catheterization; STS= Society for Thoracic Surgeons. PASP= pulmonary artery systolic pressure; TMPG= Transmitral mean pressure gradient; TR= tricuspid regurgitation.

**Table S2. Baseline Clinical and Echocardiographic Characteristics Based on Mean PA pressures.**

| <b>Baseline Characteristics</b>          | <b>Overall<br/>N=114</b> | <b>mPAP &lt; 35<br/>N=66</b> | <b>mPAP ≥ 35<br/>N=48</b> | <b>p-value</b>   |
|------------------------------------------|--------------------------|------------------------------|---------------------------|------------------|
| Age (years)                              | 74.7 [10.6]              | 76.3 [10.1]                  | 72.6 [11.0]               | 0.07             |
| Female                                   | 40 (35.1)                | 27 (40.9)                    | 13 (27.1)                 | 0.12             |
| Diabetes                                 | 35 (30.7)                | 13 (19.7)                    | 22 (45.8)                 | <b>0.003</b>     |
| Prior Stroke                             | 19 (16.7)                | 12 (18.2)                    | 7 (14.6)                  | 0.61             |
| Prior MI                                 | 26 (22.8)                | 13 (19.7)                    | 13 (27.1)                 | 0.35             |
| Dialysis                                 | 7 (6.1)                  | 3 (4.5)                      | 4 (8.3)                   | 0.45             |
| Atrial Fibrillation                      | 75 (66.4)                | 39 (59.1)                    | 36 (76.6)                 | 0.05             |
| CAD                                      | 43 (37.7)                | 23 (34.8)                    | 20 (41.7)                 | 0.45             |
| Frail                                    | 81 (71.1)                | 50 (75.8)                    | 31 (64.6)                 | 0.19             |
| BMI (kg/m <sup>2</sup> )                 | 26.3 [5.2]               | 25.1 [4.9]                   | 27.8 [5.1]                | <b>0.005</b>     |
| Hypertension                             | 84 (73.7)                | 51 (77.3)                    | 33 (68.8)                 | 0.30             |
| Prior PPM                                | 17 (14.9)                | 9 (13.6)                     | 8 (16.7)                  | 0.65             |
| Prior ICD                                | 25 (21.9)                | 19 (28.8)                    | 6 (12.5)                  | <b>0.03</b>      |
| Prior CABG                               | 27 (23.7)                | 17 (25.8)                    | 10 (20.8)                 | 0.54             |
| Prior PCI                                | 25 (21.9)                | 9 (13.6)                     | 16 (33.3)                 | <b>0.01</b>      |
| STS Risk MV repair (%)                   | 3.0 (1.5-5.3)            | 4.5 [4.5]                    | 4.6 [4.5]                 | 0.85             |
| NYHA III/IV                              | 95 (85.8)                | 53 (80.3)                    | 42 (87.5)                 | 0.30             |
| Creatinine (mg/dL)                       | 1.6 [1.3]                | 1.3 [0.5]                    | 2.0 [1.8]                 | <b>0.03</b>      |
| <b>Echocardiographic Characteristics</b> |                          |                              |                           |                  |
| MR severity                              |                          |                              |                           |                  |
| 3+                                       | 26 (22.8)                | 16 (24.2)                    | 10 (20.8)                 | 0.66             |
| 4+                                       | 88 (77.2)                | 50 (75.8)                    | 38 (79.2)                 |                  |
| MR etiology                              |                          |                              |                           |                  |
| Primary                                  | 58 (50.9)                | 37 (56.1)                    | 21 (43.8)                 | 0.41             |
| Secondary                                | 49 (43.0)                | 25 (37.9)                    | 24 (50.0)                 |                  |
| Mixed                                    | 7 (6.1)                  | 4 (6.1)                      | 3 (6.3)                   |                  |
| PASP (mmHg)                              | 52.2 [19.4]              | 42.5 [15.5]                  | 66.1 [15.7]               | <b>&lt;0.001</b> |
| LV Ejection Fraction (%)                 | 49.6 [14.0]              | 50.8 [14.6]                  | 48.0 [13.0]               | 0.28             |
| TR Severity ≥moderate                    | 40 (35.1)                | 20 (30.3)                    | 20 (41.7)                 | 0.20             |

Values are expressed as Mean [Standard Deviation] or N (%)

BMI= body mass index; BNP= B-type natriuretic peptide, BSA= body surface area; CABG= coronary artery bypass graft; CAD= coronary artery disease; ICD= Implantable cardioverter/defibrillator; MI= myocardial infarction; NYHA= New York Heart Association; PCI= percutaneous coronary intervention; STS= Society for Thoracic Surgeons. MR= mitral regurgitation; LVEF= left ventricle ejection fraction; PASP= pulmonary artery systolic pressure; PPM=permanent pacemaker; TR= tricuspid regurgitation.

**Table S3. Invasive Hemodynamic and Procedural Characteristics Based on Mean PA pressures. In-hospital, 30-day, 1- and 2- year Outcomes Based on Mean PA pressures.**

| <b>Right Heart Catheterization</b>       | <b>Overall<br/>N=114</b> | <b>mPAP &lt; 35<br/>N=66</b> | <b>mPAP ≥ 35<br/>N=48</b> | <b>p-value</b>   |
|------------------------------------------|--------------------------|------------------------------|---------------------------|------------------|
| RAP (mmHg)                               | 11.0 [6.0]               | 7.8 [4.0]                    | 15.2 [5.8]                | <b>&lt;0.001</b> |
| PASP (mmHg)                              | 51.0 [18.4]              | 38.5 [9.6]                   | 68.2 [13.0]               | <b>&lt;0.001</b> |
| PADP (mmHg)                              | 22.3 [8.7]               | 16.8 [5.1]                   | 30.1 [6.6]                | <b>&lt;0.001</b> |
| PA mean (mmHg)                           | 33.6 [11.5]              | 25.3 [5.8]                   | 45.0 [6.6]                | <b>&lt;0.001</b> |
| PCWP (mmHg)                              | 21.8 [9.1]               | 16.6 [6.5]                   | 28.7 [7.2]                | <b>&lt;0.001</b> |
| TPG (mmHg)                               | 12.1 [7.0]               | 8.8 [4.0]                    | 16.2 [8.0]                | <b>&lt;0.001</b> |
| PAPi                                     | 3.4 [2.4]                | 3.7 [2.7]                    | 3.0 [1.7]                 | 0.13             |
| PVR (WU)                                 | 3.1 [2.2]                | 2.2 [1.3]                    | 4.2 [2.6]                 | <b>&lt;0.001</b> |
| Pulmonary Artery<br>Elastance (mmHg/mL)  | 0.93 [0.4]               | 0.6 [0.3]                    | 1.4 [0.5]                 | <b>&lt;0.001</b> |
| Pulmonary Artery<br>Compliance (mL/mmHg) | 2.7 [1.8]                | 3.6 [1.9]                    | 1.5 [0.8]                 | <b>&lt;0.001</b> |
| Stroke Volume (mL)                       | 63.0 [23.9]              | 70.0 [26.2]                  | 53.6 [16.4]               | <b>&lt;0.001</b> |
| Cardiac Index (mL/m <sup>2</sup> )       | 2.3 [0.6]                | 2.4 [0.7]                    | 2.1 [0.5]                 | <b>0.03</b>      |
| RA/PCWP                                  | 0.5 [0.2]                | 0.5 [0.1]                    | 0.6 [0.2]                 | 0.12             |
| <b>Procedural Characteristics</b>        |                          |                              |                           |                  |
| Number of clips                          | 1.6 [0.6]                | 1.5 [0.6]                    | 1.7 [0.6]                 | 0.30             |
| Baseline Mean LAP<br>(mmHg)              | 20.0 [8.4]               | 17.4 [6.8]                   | 23.7 [9.2]                | <b>&lt;0.001</b> |
| Baseline V-wave (mmHg)                   | 34.5 [18.2]              | 29.7 [15.4]                  | 41.1 [19.9]               | <b>&lt;0.001</b> |
| Post-procedural Mean LAP<br>(mmHg)       | 15.0 [6.1]               | 13.6 [5.0]                   | 17.0 [6.9]                | <b>0.005</b>     |
| Post-procedural V-wave<br>(mmHg)         | 21.5 [9.7]               | 19.8 [8.4]                   | 23.9 [11.0]               | <b>0.03</b>      |
| Delta Mean LAP (mmHg)                    | 5 (1-8)                  | 4 (0-7.5)                    | 7 (4-10)                  | <b>0.01</b>      |
| Delta V-wave (mmHg)                      | 12 (3-21)                | 8 (1-20)                     | 17 (10-22)                | <b>0.005</b>     |
| <b>Outcomes:</b>                         |                          |                              |                           |                  |
| <b>In-hospital</b>                       |                          |                              |                           |                  |
| LOS (days)                               | 2 (1-4)                  | 2 (1-2)                      | 2 (1-5)                   | 0.05             |
| Discharge MR ≥moderate                   | 27 (23.6)                | 16 (24.2)                    | 11 (22.9)                 | 0.82             |
| Discharge TMPG (mmHg)                    | 4.0 [1.8]                | 3.8 [1.8]                    | 4.3 [1.8]                 | 0.17             |
| <b>30-day</b>                            |                          |                              |                           |                  |
| NYHA (III/IV)                            | 11 (14.5)                | 6 (12.5)                     | 5 (17.9)                  | 0.52             |
| MR ≥moderate                             | 35 (36.0)                | 20 (35.0)                    | 15 (37.5)                 | 0.67             |
| Mortality                                | 4 (3.5)                  | 2 (3.0)                      | 2 (4.2)                   | 0.74             |
| HFH                                      | 2 (1.8)                  | 1 (1.5)                      | 1 (2.1)                   | 0.82             |
| Composite                                | 6 (5.3)                  | 3 (4.5)                      | 3 (6.2)                   | 0.68             |
| <b>1-year</b>                            |                          |                              |                           |                  |
| Mortality                                | 22 (19.3)                | 9 (13.6)                     | 13 (27.1)                 | <b>0.07</b>      |

|                |             |           |           |             |             |
|----------------|-------------|-----------|-----------|-------------|-------------|
|                | HFH         | 12 (10.5) | 8 (12.1)  | 5 (10.4)    | 0.77        |
|                | Composite   | 31 (27.2) | 16 (24.2) | 16 (33.3)   | 0.28        |
| <b>2-year</b>  |             |           |           |             |             |
|                | Mortality   | 33 (28.9) | 14 (21.2) | 19 (39.6)   | <b>0.03</b> |
|                | HFH         | 18 (15.8) | 11 (16.7) | 8 (16.7)    | 1.00        |
|                | Composite   | 44 (38.6) | 22 (33.3) | 23 (47.9)   | 0.11        |
| <b>Overall</b> |             |           |           |             |             |
|                | FU (months) | 28 [21]   | 32 [22.5] | 25.5 [21.3] | 0.12        |

Values are expressed as Mean [Standard Deviation], median (IQR), or N (%)

PCWP: Pulmonary Capillary Wedge Pressure; RAP: Right Atrial Pressure; PASP: Pulmonary Artery Systolic Pressure; PADP: Pulmonary Artery Diastolic Pressure; PA: Pulmonary Artery; TPG: Trans-Pulmonary Gradient; PAPI: Pulmonary Artery Pulsatility index; PVR: Pulmonary Vascular Resistance; RV: Right Ventricle Systolic Pressure; RVDP: Right Ventricle Diastolic Pressure; RVEDP: Right Ventricle End Diastolic Pressure; Ea: Pulmonary Effective Arterial Elastance; PH: pulmonary hypertension, LAP: left atrial pressure. LOS: length of stay; MR: mitral regurgitation; LVEF= left ventricle ejection fraction; PASP= pulmonary artery systolic pressure; ; NYHA= New York Heart Association; TR= tricuspid regurgitation; HFH: heart failure hospitalization; FU: follow up.

**Table S4. Baseline Clinical and Echocardiographic Characteristics Based on Cardiopulmonary Hemodynamic Profile.**

| <b>Baseline Characteristics</b>              | <b>LE (N=35)<br/>Mean PAP &lt; 35<br/>Ea &lt; 0.6</b> | <b>HE- (N=31)<br/>Mean PAP &lt; 35<br/>Ea ≥ 0.6</b> | <b>HE+ (N=48)<br/>Mean PAP ≥ 35<br/>Ea ≥ 0.6</b> | <b>p-value<br/>(LE/HE-)</b> | <b>p-value<br/>(HE-/HE+)</b> | <b>p-value<br/>(Overall)</b> |
|----------------------------------------------|-------------------------------------------------------|-----------------------------------------------------|--------------------------------------------------|-----------------------------|------------------------------|------------------------------|
| Age (years)                                  | 75.0 [11.5]                                           | 77.7 [8.1]                                          | 72.6 [11.0]                                      | 0.29                        | <b>0.03</b>                  | 0.11                         |
| Female                                       | 10 (28.6)                                             | 17 (54.8)                                           | 13 (27.1)                                        | <b>0.03</b>                 | <b>0.01</b>                  | <b>0.02</b>                  |
| Diabetes                                     | 5 (14.3)                                              | 8 (25.8)                                            | 22 (45.8)                                        | 0.24                        | 0.07                         | <b>0.007</b>                 |
| Prior Stroke                                 | 6 (17.1)                                              | 6 (19.4)                                            | 7 (14.6)                                         | 0.81                        | 0.57                         | 0.85                         |
| Prior MI                                     | 8 (22.9)                                              | 5 (16.1)                                            | 13 (27.1)                                        | 0.49                        | 0.25                         | 0.52                         |
| Dialysis                                     | 2 (5.7)                                               | 1 (3.2)                                             | 4 (8.3)                                          | 0.62                        | 0.36                         | 0.64                         |
| Atrial Fibrillation                          | 17 (48.6)                                             | 22 (71.0)                                           | 36 (76.6)                                        | 0.06                        | 0.57                         | <b>0.02</b>                  |
| CAD                                          | 11 (31.4)                                             | 12 (38.7)                                           | 20 (41.7)                                        | 0.53                        | 0.79                         | 0.63                         |
| Frail                                        | 27 (77.1)                                             | 23 (74.2)                                           | 31 (64.6)                                        | 0.78                        | 0.37                         | 0.41                         |
| BMI (kg/m <sup>2</sup> )                     | 24.6 [4.9]                                            | 25.7 [5.0]                                          | 27.8 [5.1]                                       | 0.41                        | <b>0.06</b>                  | <b>0.01</b>                  |
| Hypertension                                 | 27 (77.1)                                             | 24 (77.4)                                           | 33 (68.8)                                        | 0.97                        | 0.40                         | 0.59                         |
| Prior PPM                                    | 3 (8.6)                                               | 6 (19.4)                                            | 8 (16.7)                                         | 0.20                        | 0.76                         | 0.42                         |
| Prior ICD                                    | 7 (20.0)                                              | 12 (38.7)                                           | 6 (12.5)                                         | 0.09                        | <b>0.007</b>                 | <b>0.02</b>                  |
| Prior CABG                                   | 9 (25.7)                                              | 8 (25.8)                                            | 10 (20.8)                                        | 0.99                        | 0.60                         | 0.83                         |
| Prior PCI                                    | 3 (8.6)                                               | 6 (19.4)                                            | 16 (33.3)                                        | 0.20                        | 0.17                         | <b>0.02</b>                  |
| STS Risk MV repair (%)                       | 4.5 [4.1]                                             | 4.4 [5.3]                                           | 4.6 [4.5]                                        | 0.93                        | 0.85                         | 0.98                         |
| NYHA III/IV                                  | 25 (71.4)                                             | 28 (90.3)                                           | 42 (87.5)                                        | 0.05                        | 0.70                         | 0.19                         |
| KCCQ score                                   | 46.8 [25.5]                                           | 35.8 [23.2]                                         | 39.7 [24.4]                                      | 0.09                        | 0.51                         | 0.24                         |
| Creatinine (mg/dL)                           | 1.3 [0.5]                                             | 1.4 [0.5]                                           | 2 [1.8]                                          | 0.71                        | 0.09                         | 0.05                         |
| Hemoglobin (g/dL)                            | 11.7 [2.0]                                            | 11.1 [1.8]                                          | 10.9 [2.6]                                       | 0.25                        | 0.70                         | 0.31                         |
| <b>Echocardiographic<br/>Characteristics</b> |                                                       |                                                     |                                                  |                             |                              |                              |
| MR severity                                  |                                                       |                                                     |                                                  |                             |                              |                              |
| 3+                                           | 6 (17.1)                                              | 10 (32.3)                                           | 10 (20.8)                                        | 0.26                        | 0.33                         | 0.31                         |
| 4+                                           | 29 (82.9)                                             | 21 (67.7)                                           | 38 (79.2)                                        |                             |                              |                              |
| MR etiology                                  |                                                       |                                                     |                                                  |                             |                              |                              |
| Primary                                      | 27 (77.1)                                             | 10 (32.3)                                           | 21 (43.8)                                        |                             |                              |                              |

|                                      |              |             |              |              |                  |                  |
|--------------------------------------|--------------|-------------|--------------|--------------|------------------|------------------|
| Secondary                            | 7 (20.0)     | 18 (58.1)   | 24 (50.0)    | <b>0.001</b> | 0.56             | <b>0.005</b>     |
| Mixed                                | 1 (2.9)      | 3 (9.7)     | 3 (6.3)      |              |                  |                  |
| PASP (mmHg)                          | 41.7 [19.5]  | 43.2 [10.0] | 66.1 [15.7]  | 0.70         | <b>&lt;0.001</b> | <b>&lt;0.001</b> |
| LVIDs (cm)                           | 3.3 [1.1]    | 4.0 [1.2]   | 4.0 [1.0]    | <b>0.01</b>  | 0.71             | <b>0.01</b>      |
| LVIDd (cm)                           | 5.3 [0.7]    | 5.4 [0.9]   | 5.5 [0.7]    | 0.44         | 0.79             | 0.50             |
| LA volume (mL)                       | 117.2 [51.4] | 117 [46.0]  | 120.3 [51.6] | 0.95         | 0.83             | 0.95             |
| LAVI (mL/m <sup>2</sup> )            | 61.6 [26.1]  | 63.3 [22.0] | 60.7 [24.4]  | 0.78         | 0.63             | 0.89             |
| Ejection Fraction (%)                | 55.5 [12.2]  | 45.5 [15.4] | 48.0 [13.0]  | <b>0.006</b> | 0.45             | <b>0.008</b>     |
| Mitral Valve Area (cm <sup>2</sup> ) | 5.3 [1.6]    | 4.8 [1.4]   | 5.8 [2.0]    | 0.18         | <b>0.02</b>      | 0.07             |
| Mitral Annular Calcification         | 7 (20.0)     | 9 (29.0)    | 17 (35.4)    | 0.39         | 0.55             | 0.31             |
| TR Severity $\geq$ moderate          | 9 (25.7)     | 11 (35.5)   | 20 (41.7)    | 0.38         | 0.58             | 0.32             |

Values are expressed as Mean [Standard Deviation] or N (%)

BMI= body mass index; CABG= coronary artery bypass graft; CAD= coronary artery disease; ICD= Implantable cardioverter/defibrillator; KCCQ-12= Kansas City Cardiomyopathy Questionnaire score; MI= myocardial infarction; NYHA= New York Heart Association; PCI= percutaneous coronary intervention; STS= Society for Thoracic Surgeons. MR= mitral regurgitation; LAVI= left atrium volume index; LVEF= left ventricle ejection fraction; LVIDs/d= left ventricle internal diameter (systole/diastole); PASP= pulmonary artery systolic pressure; PPM= permanent pacemaker; RAP= right atrial pressure; TR= tricuspid regurgitation.



**Table S5. Invasive Hemodynamic and Procedural Characteristics Based on Cardiopulmonary Hemodynamic Profile.**

| <b>Right Heart Catheterization</b>       | <b>LE (N=35)<br/>Mean PAP &lt;<br/>35<br/>Ea &lt; 0.6</b> | <b>HE- (N=31)<br/>Mean PAP &lt;<br/>35<br/>Ea ≥ 0.6</b> | <b>HE+ (N=48)<br/>Mean PAP ≥<br/>35<br/>Ea ≥ 0.6</b> | <b>p-value<br/>(LE/HE-)</b> | <b>p-value<br/>(HE-/HE+)</b> | <b>p-value<br/>(Overall)</b> |
|------------------------------------------|-----------------------------------------------------------|---------------------------------------------------------|------------------------------------------------------|-----------------------------|------------------------------|------------------------------|
| RAP mean (mmHg)                          | 7.1 [4.0]                                                 | 8.7 [3.8]                                               | 15.2 [5.8]                                           | 0.13                        | <0.001                       | <0.001                       |
| PASP (mmHg)                              | 34.6 [9.3]                                                | 42.9 [8.1]                                              | 68.2 [13.0]                                          | <0.001                      | <0.001                       | <0.001                       |
| PADP (mmHg)                              | 15.0 [5.5]                                                | 18.7 [4.0]                                              | 30.1 [6.6]                                           | <b>0.004</b>                | <0.001                       | <0.001                       |
| PA mean (mmHg)                           | 22.8 [6.7]                                                | 28.4 [3.7]                                              | 45.0 [6.7]                                           | <0.001                      | <0.001                       | <0.001                       |
| PCWP (mmHg)                              | 14.3 [7.0]                                                | 18.8 [5.1]                                              | 28.7 [7.2]                                           | <b>0.006</b>                | <0.001                       | <0.001                       |
| TPG (mmHg)                               | 8.1 [3.6]                                                 | 9.5 [4.3]                                               | 16.2 [8.0]                                           | <b>0.15</b>                 | <0.001                       | <0.001                       |
| PAPi                                     | 3.8 [3.0]                                                 | 3.6 [2.5]                                               | 3.0 [1.7]                                            | 0.78                        | 0.22                         | 0.30                         |
| PVR (WU)                                 | 1.6 [0.8]                                                 | 2.8 [1.4]                                               | 4.2 [2.6]                                            | <0.001                      | <b>0.002</b>                 | <0.001                       |
| Pulmonary Artery Compliance<br>(mL/mmHg) | 4.8 [1.8]                                                 | 2.2 [0.7]                                               | 1.5 [0.8]                                            | <0.001                      | <0.001                       | <0.001                       |
| Stroke Volume (mL)                       | 86.8 [21.0]                                               | 50.8 [16.6]                                             | 53.6 [16.4]                                          | <0.001                      | 0.46                         | <0.001                       |
| Cardiac Index (mL/m <sup>2</sup> )       | 2.8 [0.5]                                                 | 1.9 [0.4]                                               | 2.1 [0.5]                                            | <0.001                      | 0.11                         | <0.001                       |
| RA/PCWP                                  | 0.5 [0.1]                                                 | 0.4 [0.1]                                               | 0.6 [0.2]                                            | 0.46                        | 0.12                         | 0.22                         |
| RVSP (mmHg)                              | 33.8 [9.7]                                                | 44.0 [7.3]                                              | 65.9 [13.5]                                          | <0.001                      | <0.001                       | <0.001                       |
| RVDP (mmHg)                              | 5.9 [4.7]                                                 | 5.3 [3.8]                                               | 10.7 [4.8]                                           | 0.57                        | <0.001                       | <0.001                       |
| RVEDP (mmHg)                             | 7.7 [4.8]                                                 | 8.8 [3.7]                                               | 15.4 [5.2]                                           | 0.29                        | <0.001                       | <0.001                       |
| <b>Procedural Characteristics</b>        |                                                           |                                                         |                                                      |                             |                              |                              |
| Number of clips                          | 1.5 [0.5]                                                 | 1.5 [0.6]                                               | 1.7 [0.7]                                            | 0.88                        | 0.38                         | 0.58                         |
| Fluoroscopy time (minutes)               | 20.6 [11.0]                                               | 25.7 [15.5]                                             | 24.6 [13.6]                                          | 0.12                        | 0.73                         | 0.25                         |
| Baseline Mean LAP (mmHg)                 | 16.2 [6.3]                                                | 18.7 [7.1]                                              | 23.7 [9.2]                                           | 0.12                        | <b>0.01</b>                  | <0.001                       |
| Baseline V-wave (mmHg)                   | 28.0 [15.5]                                               | 31.8 [15.2]                                             | 41.1 [19.9]                                          | 0.32                        | <b>0.03</b>                  | <b>0.003</b>                 |
| Post-procedural mean LAP<br>(mmHg)       | 11.6 [3.5]                                                | 16.0 [5.5]                                              | 17.0 [6.9]                                           | <0.001                      | 0.53                         | <0.001                       |
| Post-procedural v-wave<br>(mmHg)         | 16.0 [6.2]                                                | 24.4 [8.5]                                              | 23.9 [11.0]                                          | <0.001                      | 0.82                         | <0.001                       |
| Delta Mean LAP (mmHg)                    | 4 (1-8)                                                   | 3 (1-7)                                                 | 6.5 (4-10)                                           | 0.44                        | <b>0.02</b>                  | <b>0.02</b>                  |

|                     |            |            |            |      |              |             |
|---------------------|------------|------------|------------|------|--------------|-------------|
| Delta V-wave (mmHg) | 8.5 (3-21) | 6.5 (3-16) | 17 (10-22) | 0.27 | <b>0.007</b> | <b>0.01</b> |
|---------------------|------------|------------|------------|------|--------------|-------------|

Values are expressed as Mean [Standard Deviation], median (IQR), or N (%)

PCWP: Pulmonary Capillary Wedge Pressure; RAP: Right Atrial Pressure; PASP: Pulmonary Artery Systolic Pressure; PADP: Pulmonary Artery Diastolic Pressure; PA: Pulmonary Artery; TPG: Trans-Pulmonary Gradient; PAPI: Pulmonary Artery Pulsatility index; PVR: Pulmonary Vascular Resistance; RV: Right Ventricle Systolic Pressure; RVDP: Right Ventricle Diastolic Pressure; RVEDP: Right Ventricle End Diastolic Pressure; Ea: Pulmonary Effective Arterial Elastance; PH: pulmonary hypertension, LAP: left atrial pressure.

**Table S6. In-hospital, 30-day, 1- and 2- year outcomes Based on Cardiopulmonary Hemodynamic Profile.**

| <b>Outcomes</b>           | <b>LE (N=35)<br/>Mean PAP &lt;<br/>35<br/>Ea &lt; 0.6</b> | <b>HE- (N=31)<br/>Mean PAP &lt;<br/>35<br/>Ea ≥ 0.6</b> | <b>HE+ (N=48)<br/>Mean PAP ≥ 35<br/>Ea ≥ 0.6</b> | <b>p-value<br/>(LE/HE-)</b> | <b>p-value<br/>(HE-/HE+)</b> | <b>p-value<br/>(Overall)</b> |
|---------------------------|-----------------------------------------------------------|---------------------------------------------------------|--------------------------------------------------|-----------------------------|------------------------------|------------------------------|
| <b>In-hospital</b>        |                                                           |                                                         |                                                  |                             |                              |                              |
| LOS (days)                | 2 (1-2)                                                   | 2 (1-3)                                                 | 2 (1-4)                                          | 0.32                        | 0.20                         | 0.08                         |
| Discharge MR ≥moderate    | 9 (25.7)                                                  | 7 (22.6)                                                | 11 (23.0)                                        | 0.68                        | 0.82                         | 0.75                         |
| Discharge TMPG (mmHg)     | 3.4 [1.6]                                                 | 4.3 [2.0]                                               | 4.3 [1.8]                                        | 0.07                        | 0.90                         | 0.08                         |
| <b>30-Day</b>             |                                                           |                                                         |                                                  |                             |                              |                              |
| LAV (mL)                  | 117.4 [42.9]                                              | 118.3 [41.6]                                            | 138.0 [60.3]                                     | 0.94                        | 0.19                         | 0.22                         |
| LAVI (mL/m <sup>2</sup> ) | 64.2 [20.4]                                               | 69.8 [22.8]                                             | 73.2 [28.3]                                      | 0.41                        | 0.65                         | 0.43                         |
| LVIDs (cm)                | 3.7 [1.1]                                                 | 4.2 [1.1]                                               | 4.1 [1.0]                                        | 0.09                        | 0.62                         | 0.18                         |
| LVIDd (cm)                | 5.1 [0.9]                                                 | 5.3 [1.1]                                               | 5.4 [0.8]                                        | 0.57                        | 0.58                         | 0.44                         |
| LVEF (%)                  | 52.8 [13.8]                                               | 44.0 [17.0]                                             | 43.8 [15.0]                                      | <b>0.03</b>                 | 0.95                         | <b>0.02</b>                  |
| PASP (mmHg)               | 43.6 [13.9]                                               | 50.0 [13.4]                                             | 53.2 [13.5]                                      | 0.11                        | 0.37                         | <b>0.02</b>                  |
| TR ≥moderate              | 3 (9.1)                                                   | 11 (42.3)                                               | 18 (46.2)                                        | <b>0.003</b>                | 0.76                         | <b>0.002</b>                 |
| NYHA (III/IV)             | 3 (11.1)                                                  | 3 (14.3)                                                | 5 (17.9)                                         | 0.74                        | 0.73                         | 0.88                         |
| MR ≥moderate              | 7 (21.9)                                                  | 14 (56.0)                                               | 17 (42.5)                                        | <b>0.008</b>                | 0.28                         | <b>0.02</b>                  |
| TMPG (mmHg)               | 3.5 [2.1]                                                 | 4.2 [2.0]                                               | 4.8 [2.1]                                        | 0.21                        | 0.37                         | 0.08                         |
| Mortality                 | 0 (0)                                                     | 2 (6.5)                                                 | 2 (4.2)                                          | 0.12                        | 0.65                         | 0.34                         |
| HFH                       | 0 (0)                                                     | 1 (3.2)                                                 | 1 (2.1)                                          | 0.28                        | 0.75                         | 0.59                         |
| Composite                 | 0 (0)                                                     | 3 (9.7)                                                 | 3 (6.3)                                          | 0.06                        | 0.57                         | 0.19                         |
| <b>1-year</b>             |                                                           |                                                         |                                                  |                             |                              |                              |
| Mortality                 | 3 (8.6)                                                   | 6 (19.4)                                                | 13 (27.1)                                        | 0.20                        | 0.43                         | 0.10                         |
| HFH                       | 1 (2.9)                                                   | 7 (22.6)                                                | 5 (10.4)                                         | <b>0.01</b>                 | 0.14                         | <b>0.04</b>                  |
| Composite                 | 4 (11.4)                                                  | 12 (38.7)                                               | 16 (33.3)                                        | <b>0.01</b>                 | 0.62                         | <b>0.02</b>                  |
| <b>2-year</b>             |                                                           |                                                         |                                                  |                             |                              |                              |
| Mortality                 | 4 (11.4)                                                  | 10 (32.3)                                               | 19 (39.6)                                        | <b>0.03</b>                 | 0.51                         | <b>0.01</b>                  |

|                |             |             |             |                  |      |              |
|----------------|-------------|-------------|-------------|------------------|------|--------------|
| HFH            | 1 (2.9)     | 8 (16.7)    | 10 (32.3)   | <b>0.001</b>     | 0.10 | <b>0.006</b> |
| Composite      | 5 (14.3)    | 17 (54.8)   | 23 (47.9)   | <b>&lt;0.001</b> | 0.54 | <b>0.001</b> |
| <b>Overall</b> |             |             |             |                  |      |              |
| FU (months)    | 36.6 [21.7] | 25.2 [21.6] | 25.5 [21.3] | <b>0.02</b>      | 0.96 | <b>0.01</b>  |

Values are expressed as Mean [Standard Deviation], median (IQR), or N (%)

LOS: length of stay; MR: mitral regurgitation; LAV: left atrium volume; LVEF= left ventricle ejection fraction; ; LVIDs/d= left ventricle internal diameter (systole/diastole); PASP= pulmonary artery systolic pressure; ; NYHA= New York Heart Association; TMPG= transmitral mean pressure gradient; TR= tricuspid regurgitation; HFH= heart failure hospitalization; FU: follow up.

**Table S7. RV-PA coupling within the hemodynamic cardiopulmonary profiles.**

|                          | <b>LE (N=26)<br/>mPAP &lt; 35<br/>Ea &lt; 0.6</b> | <b>HE- (N=23)<br/>mPAP &lt; 35<br/>Ea ≥ 0.6</b> | <b>HE+ (N=38)<br/>mPAP ≥ 35<br/>Ea ≥ 0.6</b> | <b>p-value<br/>(Overall)</b> | <b>p-value<br/>(LE/HE-)</b> |
|--------------------------|---------------------------------------------------|-------------------------------------------------|----------------------------------------------|------------------------------|-----------------------------|
| TAPSE (cm)               | 1.7 [0.6]                                         | 1.6 [0.5]                                       | 1.6 [0.5]                                    | 0.83                         | 0.63                        |
| Echo-derived PASP (mmHg) | 39.5 [16.5]                                       | 41.7 [10.7]                                     | 65.8 [15.9]                                  | <b>&lt;0.001</b>             | 0.59                        |
| TAPSE/PASP (mm/mmHg)     | 0.5 [0.4]                                         | 0.4 [0.1]                                       | 0.36 [0.1]                                   | <b>&lt;0.001</b>             | 0.16                        |
| Invasive PASP (mmHg)     | 33.6 [8.6]                                        | 41.6 [8.4]                                      | 67.9 [12.9]                                  | <b>&lt;0.001</b>             | <b>&lt;0.001</b>            |
| Invasive SV (mL)         | 84.4 [20.2]                                       | 49.1 [17.0]                                     | 53.9 [15.2]                                  | <b>&lt;0.001</b>             | <b>&lt;0.001</b>            |
| Ea (mmHg/mL)             | 0.4 [0.1]                                         | 0.9 [0.3]                                       | 1.4 [0.5]                                    | <b>&lt;0.001</b>             | <b>&lt;0.001</b>            |

Values are expressed as Mean [Standard Deviation], median (IQR), or N (%)

Ea= Pulmonary effective arterial elastance; PASP= pulmonary artery systolic pressure; SV= stroke volume; TAPSE= Tricuspid annular plane systolic excursion

**Figure S1. Overall and Event-Free Survival Analysis according to PH severity.**

Compared to the none/mild PH group, cumulative overall and event-free survival were lower in the moderate/severe PH group at

## Overall and Event-Free Survival Analysis According to PH severity

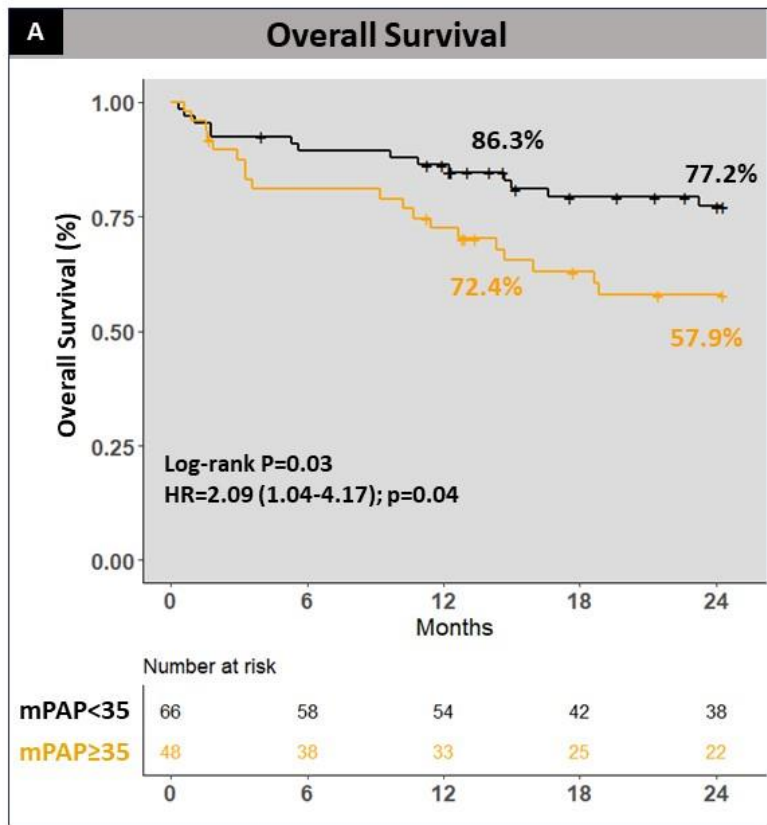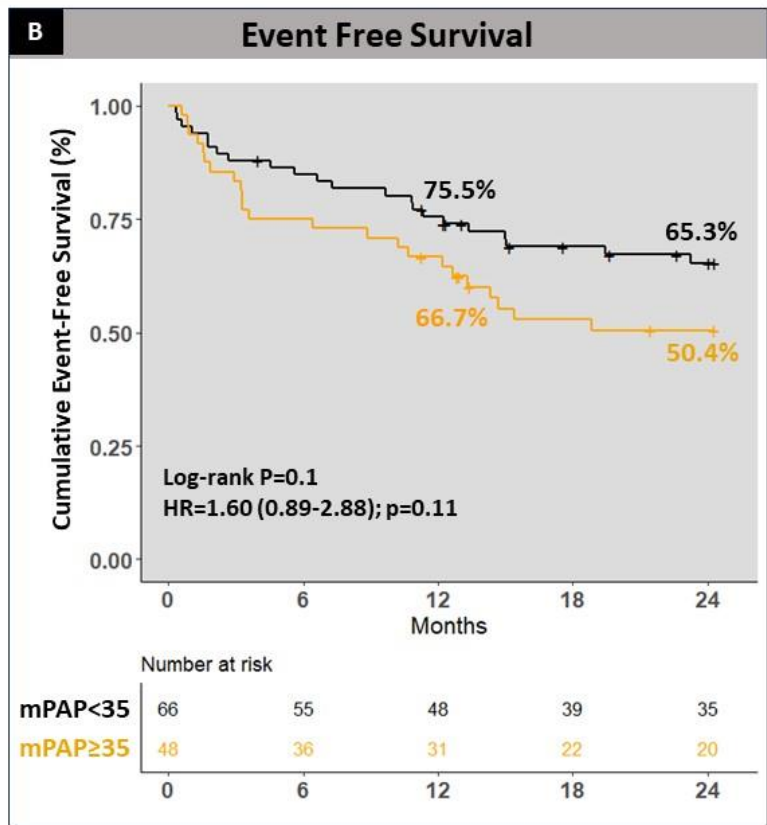

HR= Hazards Ratio, PH= pulmonary hypertension

Figure S2. Survival Analysis according to MR etiology and the 3 profiles stratified by Ea and MR etiology.

### Survival Analysis According to MR etiology and Hemodynamic Profile

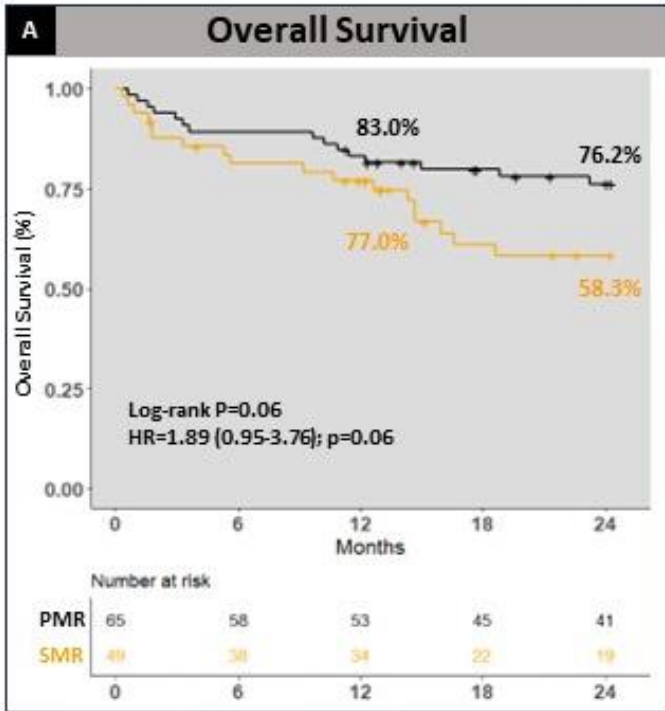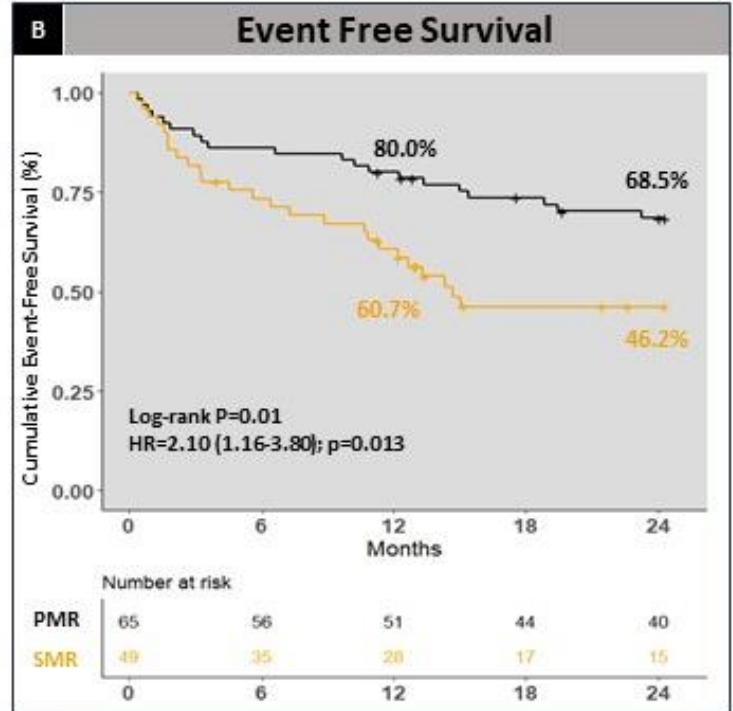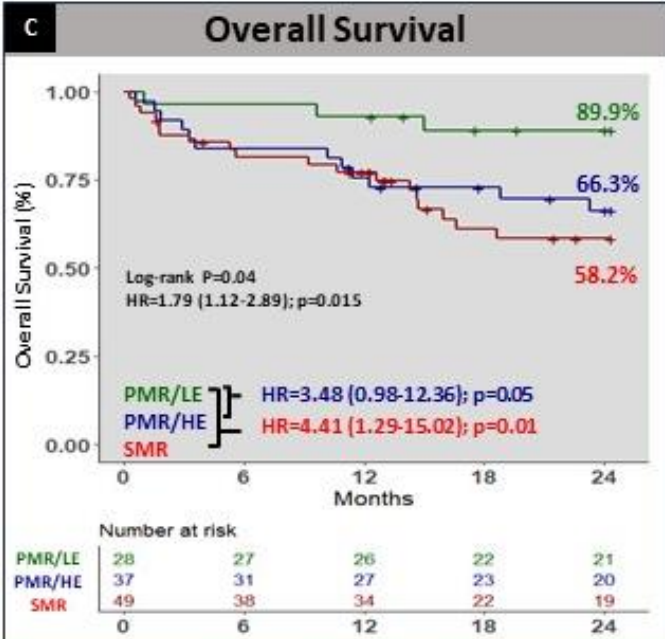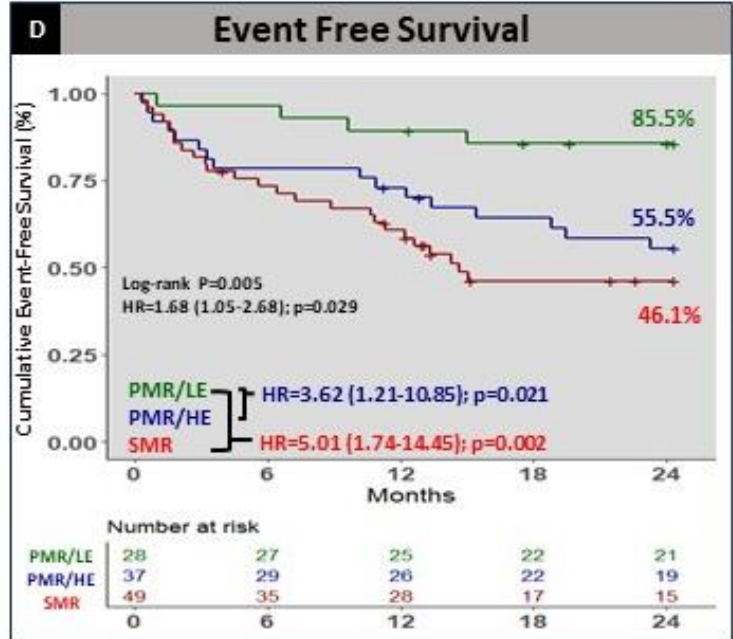

HR= Hazards Ratio, MR= mitral regurgitation; PMR= primary mitral regurgitation; SMR= secondary mitral regurgitation, LE= low elastance (<0.6), HE= high elastance (>0.6)
